# Supplementary material for: Validation of the parent version of the Strengths and Difficulties Questionnaire (SDQ) to screen mental health problems among school-age children in Mongolia
Source: Springer Nature journal article supplement (doi:10.1186/s12888-021-03218-x), 2021-04-29

Distribution of total difficulties score  
(Male participants)

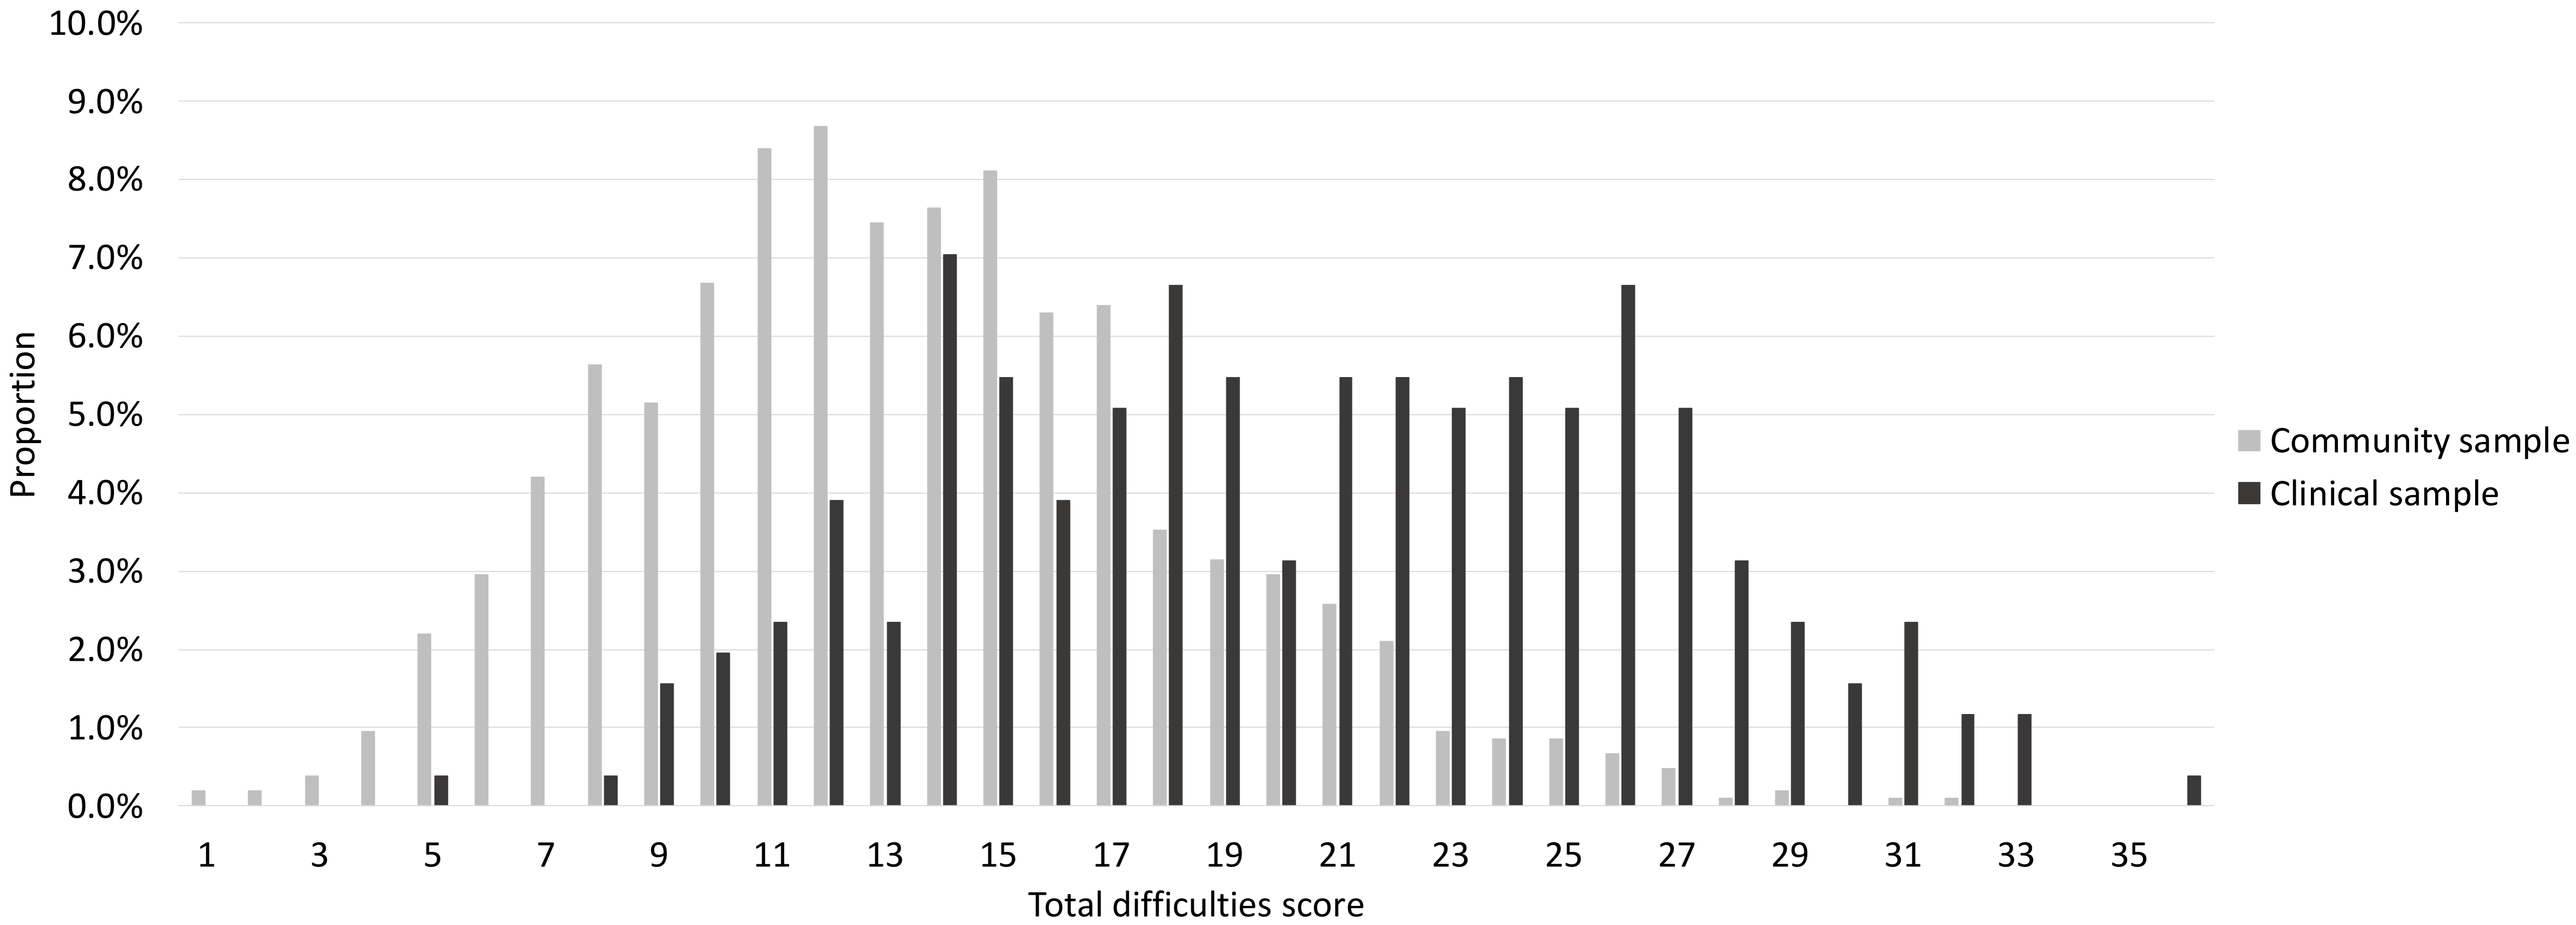

Distribution of total difficulties score  
(Female participants)

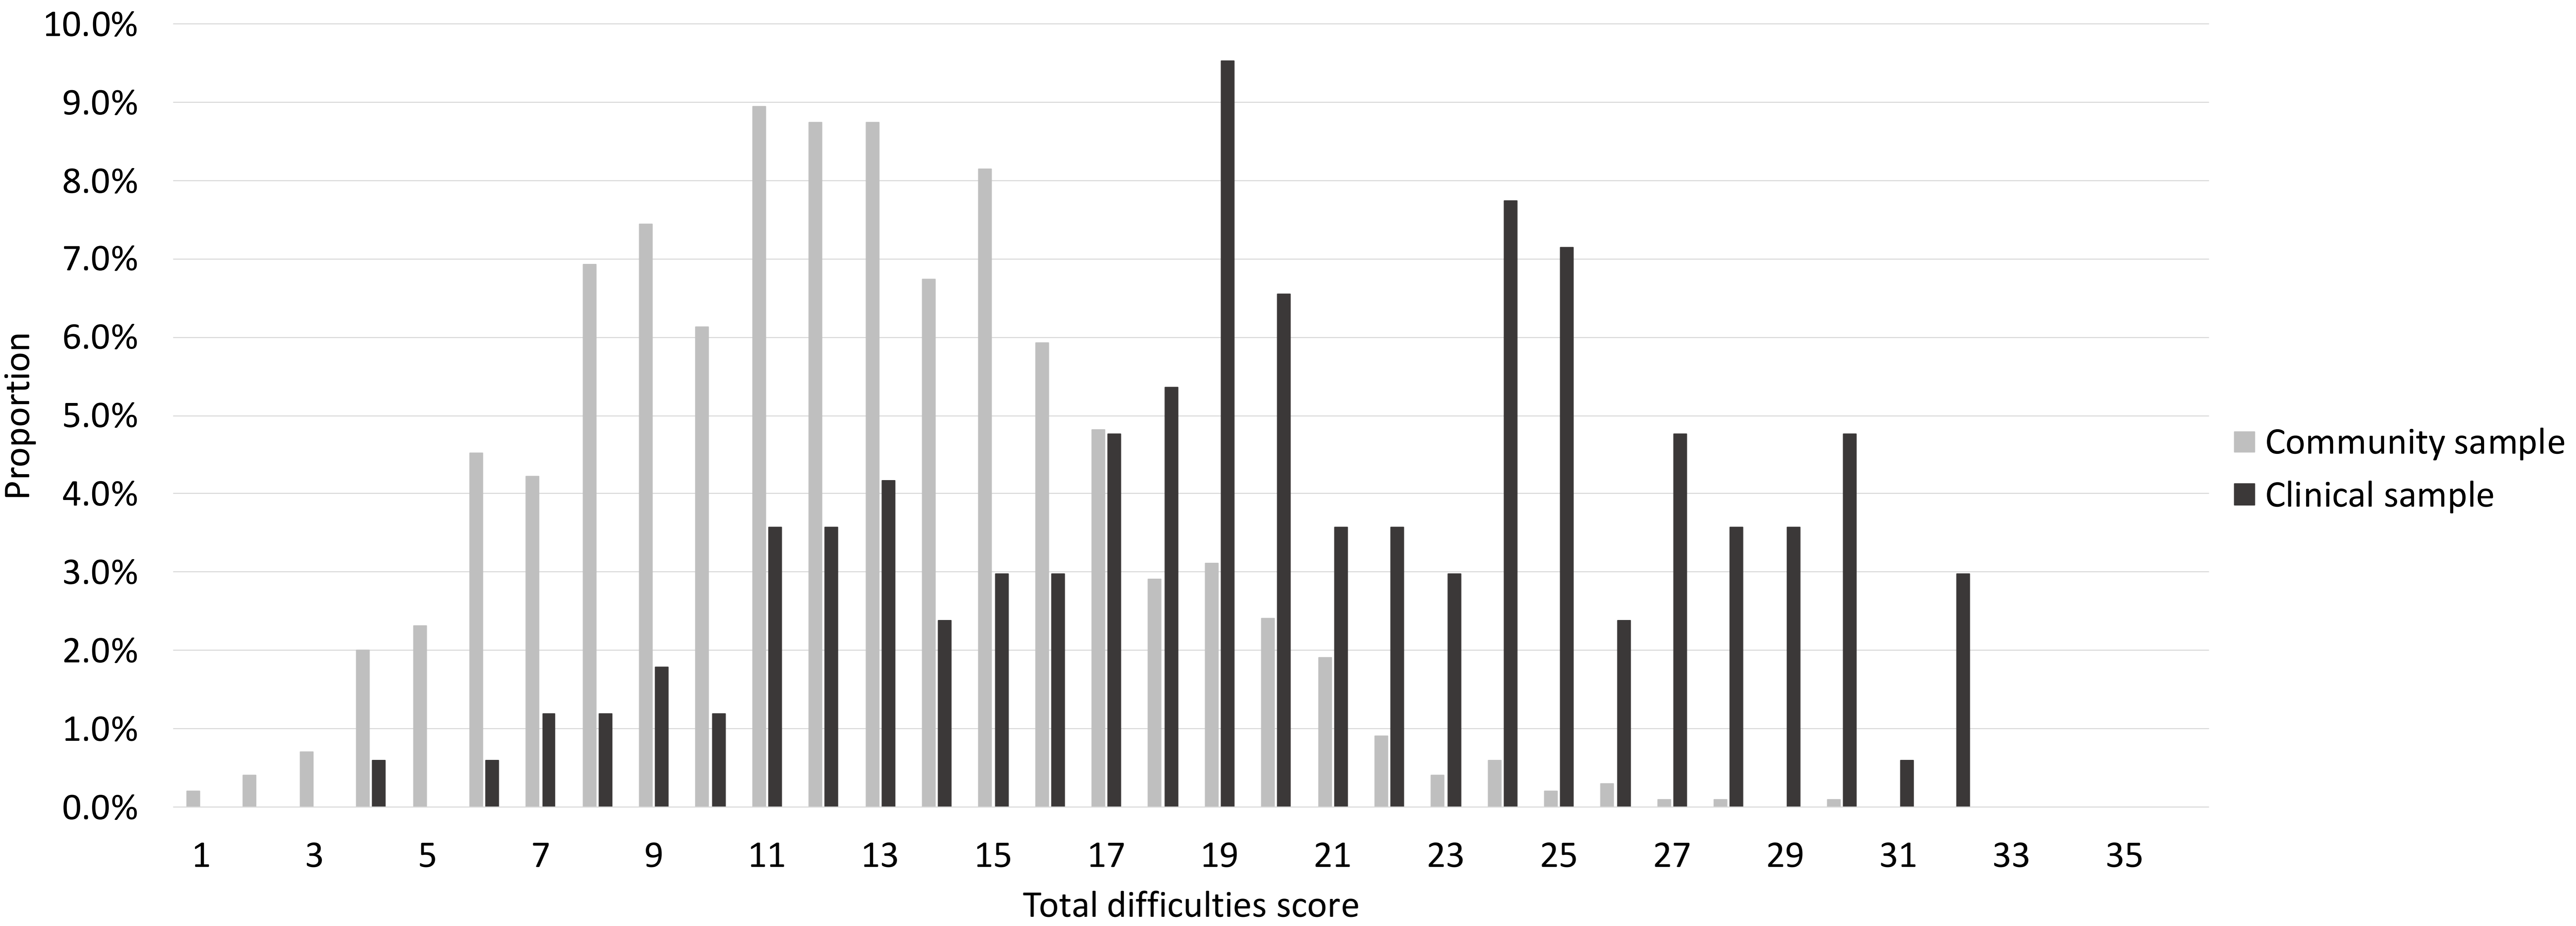

Supplement: MOESM1 [file 19118302]
